# Supplementary material for: Program Evaluation of GLA:D® Australia: Physiotherapist Training Outcomes and Effectiveness of Implementation for People With Knee Osteoarthritis
Source: Research Square preprint supplement (doi:10.21203/rs.3.rs-169093/v1), 2021-02-02
Supplement: Supplementary file 1 [file 65462b0dc230c59b0b109d2e.docx]

**Supplementary file 6** Detailed findings related perceived barriers and enablers at a system, health services, health professional, patient and program level.

***Barriers:***

| **System** | |
| --- | --- |
| Funding | - Funding in public health setting - Funding with MAC and confusion re referrals from GPs - GLA:D would also be easier to implement in my region if Medicare would fund (low socio-economic area and low patient numbers due to rural nature). - local GLAD program being offered at local community health services at a much cheaper rate - The My Aged Care referral process for participants who are 65 and over |
| Personal cost to patient | - Cost and willingness from patients - cost effectiveness in terms of remuneration for physio's time for supervised exercises and education sessions. - Cost for some patients - cost to client for program - Cost to patients - COVID-19 - cost to patient. - Financial barriers for client in private practice as have to do one on one and costs more - Financial cost for patients - getting patients into the program cost - We don't have enough patients to sustain GLA:D specific classes, plus people are hesitant to pay for the program. |
| **Health Services** | |
| Conflicting managerial and organisational priorities | - Awareness? - need a GP education night - Colleague and patient buy in. - GP and orthopod education together with the beliefs and culture of the community and the value placed on doctors opinions - Lack of awareness amongst community of what GLAD is (I get GLAD is the acronym, but perhaps a better name might be more helpful in spreading the message instantly. i.e Taking charge of your OA (or knee/hip pain), or "OA care" or alike - Lack of awareness amongst GPs/Surgeons/refer's and the cost of providing food platters when trying to educate them (seriously) - Lack of community awareness amongst public and health professionals, especially GPs - lack of patient/community knowledge about management of oa - Letting people & medical personal know about the program - Marketing. - None but still need docs referring more so GP education is a big factor |
| Equipment and physical space | - Access to cardio equipment. - current space of clinic - Currently our own gym space, however this is to improve in 1-2 months. - equipment - Gym availability - availability of spaces available - Lack of equipment ie mirrors and appropriate space availability - lack of space to conduct the classes in the clinical setting, - Limited space in private clinic for group classes - No easy access to appropriate space to hold classes. - no gym space in practice, - Not much space - Room availability, material not available for vision impaired clients - space - Space - Space to accommodate enough participants. - space to run classes, - Space to run enough people at a time to make it just as valuable as seeing patients one on one - Space. - Would be better in a larger space, I feel my current space restricts me to a maximum 3 patients per session and this seems a bit inefficient |
| Fit of program to service | - Hospital setting - I am currently working locum jobs overseas. As a locum I am aware that my ability to implement and oversee new programs is limited. - I don't treat patients with knee osteoarthritis - I work in the Pain Department of a public hospital. The OACCP program is already being provided by others so unfortunately I can’t provide GLAD. However, I implement a lot of what I learnt in the course in pain management programs and 1:1 sessions. - Kind of referrals I get are mostly post surgical - my practice is orientated to other areas. - Patient co-morbidities - Room availability, material not available for vision impaired clients |
| Inadequate time to support program administration | - Admin time for clinician (paperwork/documentation tc) - Difficulty finding a time to educate GPs/surgeons/refers - Logging patient information into the database in a busy private practice - Mainly have had other issues since did course and haven’t had the oomph! - No admin staff to assist with administrative tasks - Better information and coordination of the program to our clients - this is an organisational issue to sort out. - admin support |
| Scheduling | - Ability to cost effectively run enough classes to fit in clients during the week - Availability of suitable session times for clients. - Demand outstripping our capacity - frequency (twice a week)- staffing, patient motivation, fee etc - Patient intake. - Scheduling sessions at a time that will suit a large number of people. - Staff availability - time constraints - both for staff and clients - Unable to offer a variety of times |
| Staff resourcing and capacity to meet demand | - staffing - No additional physio to reduce my case load!! - Small clinic, light on staff, can't commit to full program - sole practitioner, - Staff availability - staffing levels - Current implementing and long waiting list - Demand outstripping our capacity |
| Rural/regional location | - GLA:D would also be easier to implement in my region if Medicare would fund (low socio-economic area and low patient numbers due to rural nature) - I live in a small rural town - population 4000, in the middle of a drought year! Not much money around - running a programme that will pay me my usual hourly rate is not likely - Travel distance for patients to come to our group - 30+ km in some cases. That will limit our numbers - rural/remote setting |
| **Health Professional** | |
| Referrer (eg GP) buy-in | - Awareness? - need a GP education night - Barriers to referral to GLAD programs in the hospital setting - Beliefs - ?lack of referral for physio - Colleague and patient buy in. - Funding with MAC and confusion re referrals from GPs - GP and orthopod education together with the beliefs and culture of the community and the value placed on doctor’s opinions - Lack of awareness amongst GPs/Surgeons/referrer and the cost of providing food platters when trying to educate them (seriously) - Limited referrals from Doctors. - low numbers of referrals - Medical model of care and modest amount of GP referrals for OA - Need more referrals from GPs and hospital clinics - None but still need docs referring more so GP education is a big factor - Poor referral into our GLA:D program - referral - Referrals from GP's - Referrals in for GLA:D - only had 2 referrals in 12 months, 1 wasn't appropriate - Resistance from medical and surgical community - societal / HCP beliefs and expectations |
| **Patient** | |
| Patient beliefs and understanding | - Availability and convincing patients with clinical signs that the glad classes will help if they are convinced surgery is the only way - GP and orthopod education together with the beliefs and culture of the community and the value placed on doctor’s opinions - Lower levels of health education - patient interest - societal / hcp beliefs and expectations - Some patients prefer not to do the online part, just want to do the exercises & education. Some don't want to commit to it, just do it if / when they can. Some have other problems to deal with when they present. - Those wanting a quick fix. |
| Patient demand | - Ability to cost effectively run enough classes to fit in clients during the week - Difficulty with getting enough participants in a small community to commence group program. - Getting enough patients to make class worthwhile - getting patients into the program - Having continuous numbers in classes and education sessions - if numbers are low the business questions whether we need to cancel GLAD - Lack of numbers and referrals - local GLAD program being offered at local community health services at a much cheaper rate - low numbers of referrals - Need more referrals from GPs and hospital clinics - Number of patients as compared to the number of GLAD offering clinics. - participant numbers, - Patient numbers for referrals in a rural setting; - recruitment of patient numbers - sole practitioner, difficulty getting appropriate numbers to make it affordable and sustainable. - Sole trader- difficult to get numbers to regularly start bigger groups. Tend to have small groups 3/4 participants - very small country town - population not big enough for ongoing classes. - We don't have enough patients to sustain GLA:D specific classes, plus people are hesitant to pay for the program. |
| Patient motivation and commitment | - Colleague and patient buy in. - Cost and willingness from patients - patient motivation, - getting patients to commit to classes - Low levels of motivation to participate 2 x week at Hospital - Patients readiness to change (surgical dependency) - Poor motivation to return for 3 month reviews - Some patients prefer not to do the online part, just want to do the exercises & education. Some don't want to commit to it, just do it if / when they can. Some have other problems to deal with when they present. - Those wanting a quick fix. - time constraints - both for staff and clients |
| **Program** | |
| Access to training | - Cost of training more providers - expense of doing the course for therapists working with us for 4 months - lack of staffing in community health- awaiting more to be trained - no train the trainer model - Other trained physios. - Staff training in GLAD in public health. the course is not a priority for less experienced physiotherapist to spend their own money on - Training of staff to help me. |
| Suitability for CALD groups | - A number of non English speaking clients requiring interpreters (this is not accommodated in the current GLA:D program). - Language barriers (lack of interpreters) - non English speaking clients - Non English speaking clients - Non English speaking patients |
| Suitability for patients with more complex needs | - Some have other problems to deal with when they present - Patient co-morbidities - material not available for vision impaired clients - Lower literacy and health literacy levels |
| Requirements related to online data collection or participation (telehealth) | - Patients without access to internet and emails - COVID-19 problems for groups and many people do not have reliable internet in our region to enable online program |
| COVID-19 (preventing face to face care) | - Age of patients due to coronavirus restrictions - Coronavirus - covid - COVID - 19 - COVID 19 - COVID 19! - COVID-19 - cost to patient. - Covid19 and therefore no classes allowed. Video class can be provided but this is not practical for all participants. - COVID-19 problems for groups and many people do not have reliable internet in our region to enable online program - COVID-19! - I can only offer GLA:D if employed by someone to do so. Coronavirus limiting face to face contact and group settings. - Presently COVID-19, but offering as a telehealth option. - The current restrictions due to Covid 19! - Global pandemic |
| Program ethics and legal requirements | - consent for data collection from patients - Getting through ethics - Public health system red tape |
| Program promotion and awareness | - Awareness? - need a GP education night - Lack of awareness amongst community of what GLAD is (I get GLAD is the acronym, but perhaps a better name might be more helpful in spreading the message instantly. ie Taking charge of your OA (or knee/hip pain), or "OA care" or alike - Lack of awareness amongst GPs/Surgeons/referrers and the cost of providing food platters when trying to educate them (seriously) - Lack of community awareness amongst public and health professionals, especially GPs - lack of patient/community knowledge about management of OA - None but still need doctors referring more so GP education is a big factor |

***Enablers:***

| **System** | |
| --- | --- |
| Funding | - Funding or partially funding the program, or at least having a Medicare/ private health fund/insurer/government 'tick of approval' or 'stamp' so it is at least supported by the above (even if it is not funded). - funding for the programme - it would make it more financially viable in my situation and I could offer to smaller groups. - Battling perceived financial viability right now so not much! - Funded packages so that we can refer to other providers at no cost to the client! - Funding - government subsidies e.g. Medicare rebate - lower cost- funding - health care reform - funding - Health insurances funding the program or Medicare covering the program completely. - If it was mandatory for people to participate in a supervised GLA:D program before being eligible for Medicare rebates on hip and knee replacements will encourage more enrolment for people to try it. - Improved funding so that we can run more sessions - Be able to bypass the complication of My Aged Care referrals...especially for clients who are referred from the public hospital OAHKS physiotherapists. - Better Medicare funding for these courses. - Medicare funding and increased private health insurance funding - Medicare funding for clients - Medicare funding. - Medicare rebates would be a huge incentive for clients - More funding for greater group exercises - more funding from PHI or Medicare - Not having to use MAC for patients over age of 65; being able to refer directly from ortho clinics to GLA:D without having to go through MAC which would probably require additional funding to provide the GLAD program - rebates specifically for exercise treatment for OA - similar to diabetes management plan and additional to current Team Care Arrangements - Subsidised cost. - Wish private health insurance would increase payments for conservative first line management instead of spending on joint replacements |
| **Health services** | |
| Equipment and physical space | - Access to larger local exercise space. - Space |
| Fit of program to service | - Caters to existing case load - assessment and reassessment that can be done within a smaller clinical setting. |
| Scheduling | - Discussing timing with clinic owner and creating more classes - More classes - Offering different class schedules and times - eg block of classes versus rolling intake - Start with individual sessions or small groups - To be able to have clients attend a broader range of session times by having them attend a session where other clients are doing pilates (ie not a session that is for GLAD clients only) |
| Staff resources | - Hire more staff, train them in GLAD - if I teamed up with another physio for the purpose of GLA:D - More staff trained and run more groups - I would need to move office, increase fees, and employ someone else - not easy in my region which is typically short of health professionals. |
| **Health Professional** | |
| Referrer (eg GP) buy-in | - ?GP education night - A lot more education with GPs, surgeons to refer to Physiotherapists trained in GLAD or like rather than sending straight to orthopaedic surgeons. - Education for surgeons and GPs - Getting GPs and nurses on board and encouraging client participation - Global patient and GP education - GP and surgeon referrals - GP awareness - GP awareness of guidelines & want to refer to exercise-based interventions - GP educators - GP understanding and referral for clients - Greater awareness by GPs and other health professionals - greater awareness from community to referrers - public and hcp education - Improved GP and orthopod education on its benefits - increase referral base - Increased colleague buy-in and therefore referrals. - Increased professionals (GP - surgeon) buy in. - Increased education and awareness of GPs and community - endorsement by orthopaedic surgeons locally and globally (Australia wide) - More publicity with GPs. - More education to GPs - National and state education for OA patients, GPs and ortho's that exercise and weight loss are the best first treatment for OA and physiotherapists are the people to implement it. - Ongoing networking and marketing to GPs and visiting orthopaedic surgeons in our region - regular presentations to GPs and general public - surgeon referrals from within the organisation. Get surgeons on board and work alongside them to provide best care |
| **Patient** | |
| Patient beliefs and understanding | - Better information and coordination of the program to our clients - this is an organisational issue to sort out. - Overall physical activity education and strength education for patients - Overall education to improve health literacy - Global patient and GP education - public and HCP education |
| Patient demand | - Continued patient enrolment in our GLA:D program - increase referral base |
| **Program** | |
| Access to training | - "train the trainer" capabilities - our staff rotate too often to train everyone with GLAD official - cheaper training - Hire more staff, train them in GLAD - Many of our community health physios have completed GLA:D training. - More staff trained and run more groups - More Training places and courses in Adelaide |
| CALD issues | - Translated materials for CALD clients. - resources for NESB clients |
| Central program support | - Structured program - Assistance with ethics clearance - more online resources - dropbox - ease of completing all the paperwork/follow up - Ethics assistance. Ethics directly between GLAD and NSW Health - Recognition at an area health level when guidelines are implemented - I would like a better ex form for our clients. The current GLA:D one is too small and is confusing for clients, especially in the first 2-3 weeks. - More ongoing updates - A streamlined treatment for patients. - Not sure, all the facilitators were good on the course. - online education sessions/videos may be useful for clients to save doing the education sessions in the clinic - Re-introduction of the online logging system |
| Data and evidence | - Evidence based - Be good to have some feedback regarding the data collected from our site so that we can demonstrate and improve on the effectiveness of our service - Research supporting the use of education and neuromotor exercises for this population |
| Further professional development | - GLAD training in public health setting - I have training in Telehealth and could provide these classes to people online. - Improving knowledge/ skills around weight loss and healthier eating - knowledge of effective weight loss measures - Telehealth and live streaming classes to patients who have had an initial assessment |
| PR | - Continued marketing - A global marketing campaign - Better information and coordination of the program to our clients - this is an organisational issue to sort out. - Overall physical activity education and strength education for patients - Overall education to improve health literacy - Global patient and GP education - greater awareness from community to referrers - public and HCP education - Increased advertising. - Increased education and awareness of GPs and community - Marketing locally but also by Glad Aust in the general media - National and state education for OA patients, GPs and ortho's that exercise and weight loss are the best first treatment for OA and physiotherapists are the people to implement it. - regular presentations to GPs and general public - Letting people & medical personal know about the program - Marketing. - GP and orthopod education together with the beliefs and culture of the community and the value placed on doctor’s opinions - Colleague and patient buy in. |
